# Supplementary material for: PpNAC187 Enhances Lignin Synthesis in ‘Whangkeumbae’ Pear (Pyrus pyrifolia) ‘Hard-End’ Fruit
Source: PubMed Central journal article supplement (PMC6930614; doi:10.3390/molecules24234338), 2019-11-27
Supplement: molecules-24-04338-s001.pdf [file molecules-24-04338-s001.pdf]

## Supplementary materials

**Table 1.** Gene-specific primer sequences used in the RT-qPCR analysis of gene expression.

| Gene name      | Gene ID   | Primer name | Primer sequence             |
|----------------|-----------|-------------|-----------------------------|
| <i>PpNAC1</i>  | PCP044783 | PpNAC1-F    | 5'-CCAAACATACCCACCAAGCA-3'  |
|                |           | PpNAC1-R    | 5'-TGAGCTACTTCCTTCGCCAA-3'  |
| <i>PpNAC2</i>  | PCP012487 | PpNAC2-F    | 5'-TGACAACACCAGAAACAGCG-3'  |
|                |           | PpNAC2-R    | 5'-CCGAACTGAAACATTTGCCG-3'  |
| <i>PpNAC3</i>  | PCP013078 | PpNAC3-F    | 5'-AAAGATGGTGAGCTGGTGGT-3'  |
|                |           | PpNAC3-R    | 5'-GTACTCCACAAGACCTGCCT-3'  |
| <i>PpCOMT</i>  | PCP007841 | PpCOMT-F    | 5'-GTTTACACCGGCTACTCCCT-3'  |
|                |           | PpCOMT-R    | 5'-CCCCAACCTTACCAAATCG-3'   |
| <i>Pp4CL</i>   | PCP024172 | Pp4CL-F     | 5'-ACTCCTACTGCCTCCACAAC-3'  |
|                |           | Pp4CL-R     | 5'-GCTGCCTCATCCTTCATTGG-3'  |
| <i>PpCAD1</i>  | JX290376  | PpCAD1-F    | 5'-GATGTCACAGACCCAAAGGCA-3' |
|                |           | PpCAD1-R    | 5'-AGGCGTTCGAGGTTTTCCAT-3'  |
| <i>PpCAD2</i>  | KJ577637  | PpCAD2-F    | 5'-TTTGGTTGAGAGAGTTGCCAC-3' |
|                |           | PpCAD2-R    | 5'-ATTCGACACCCAAGCTCTTCG-3' |
| <i>PpCCR</i>   | PCP040222 | PpCCR-F     | 5'- ATGTCGAAGCAGGGTGAGGT-3' |
|                |           | PpCCR-R     | 5'- CTAGGCATTGGAGTAACTCA-3' |
| <i>PcActin</i> | AF386514  | PcActin-F   | 5'-CCCAGAAGTGCTCTTCCAAC-3'  |
|                |           | PcActin-R   | 5'-TTGATCTTCATGCTGCTTGG-3'  |
| <i>NtActin</i> | AB158612  | NtActin-F   | 5'-TGTTGGAATGGAAGCTGCTG-3'  |

---

NtActin-R

5'-TTTGGGTGGACAATGGAAG-3'

---

**Table 2.** Primer sequences used in the cloning of *PpNAC187* and transgenic plant validation.

| Gene name                       | Primer name | Primer sequence                              |
|---------------------------------|-------------|----------------------------------------------|
| <i>PpNAC3</i>                   | PpNAC3-F    | 5'-ATGCTTCCTCCATGGCATCCTCAG -3'              |
| PCP013078                       | PpNAC3-R    | 5'- TCACTTTGGTACTCCATCTACAACG-3'             |
| <i>PpNAC3</i> (XhoI<br>HindIII) | PpNAC3-F    | 5'-GCGCTCGAGATGTCTTCCTCCATGGCATCCTCAG -3'    |
|                                 | PpNAC3-R    | 5'- GCGAAGCTTTCACTTTGGTACTCCATCTACAACG-3'    |
| PCP013078                       |             |                                              |
| <i>PpNAC3</i> (KpnI<br>HindIII) | PpNAC3-F    | 5'-GCGAAGCTTATGTCTTCCTCCATGGCATCCTCAG -3'    |
|                                 | PpNAC3-R    | 5'- GCGGTACCTCACTTTGGTACTCCATCTACAACG-<br>3' |
| PCP013078                       |             |                                              |
| NPTII                           | NPTII-F     | 5'-ATGATTGAACAAGATGGATTGC -3'                |
|                                 | NPTII-R     | 5'-TCAGAAGAAGCTCGTCAAGAAGG -3'               |

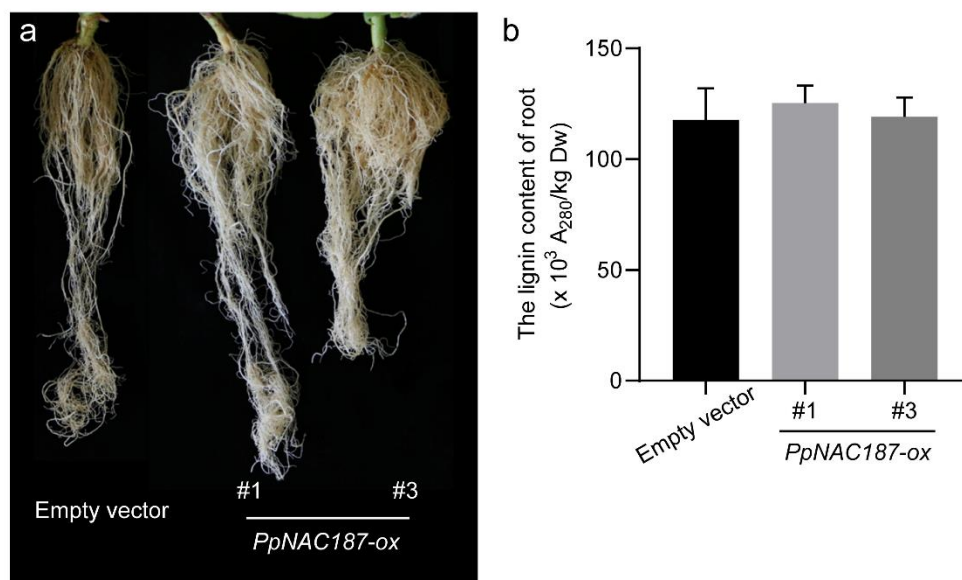

**Figure S1** The morphology and lignin content of roots in *PpNAC187*-overexpressing transgenic tobacco plants.
